# Supplementary material for: Synthesis of New GABAA Receptor Modulator with Pyrazolo[1,5-a]quinazoline (PQ) Scaffold
Source: PubMed Central journal article supplement (PMC6470557; doi:10.3390/ijms20061438), 2019-03-21
Supplement: ijms-20-01438-s001.pdf [file ijms-20-01438-s001.pdf]

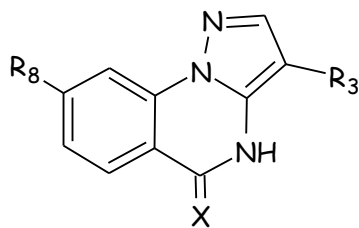

**3a-h, 7, 11a, b, d-g**

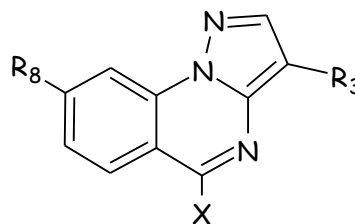

**4a-c, 5a-i, 6a-g, 8, 9a, b, 10**

**Table S1: Chemical data for Pyrazolo[1,5-a]quinazoline derivatives**

| Comp.     | R <sub>3</sub>    | R <sub>8</sub> | X  | Formula (MW)                                                               | mp °C<br>recryst. solvent |
|-----------|-------------------|----------------|----|----------------------------------------------------------------------------|---------------------------|
| <b>3a</b> | phenyl            | H              | O  |                                                                            | [1]                       |
| <b>3b</b> | 2-thienyl         | H              | O  | C <sub>14</sub> H <sub>9</sub> N <sub>3</sub> OS (267.31)                  | 243-245 °C methoxyethanol |
| <b>3c</b> | 3-thienyl         | H              | O  | C <sub>14</sub> H <sub>9</sub> N <sub>3</sub> OS (267.31)                  | 232-234 °C methoxyethanol |
| <b>3d</b> | 2-thienyl         | OMe            | O  | C <sub>15</sub> H <sub>11</sub> N <sub>3</sub> O <sub>2</sub> S (297.33)   | 288-289 °C methoxyethanol |
| <b>3e</b> | 3-thienyl         | OMe            | O  | C <sub>15</sub> H <sub>11</sub> N <sub>3</sub> O <sub>2</sub> S (297.33)   | >300 °C ethanol           |
| <b>3f</b> | CO-(2-OMe)-Ph     | OMe            | O  | C <sub>19</sub> H <sub>15</sub> N <sub>3</sub> O <sub>4</sub> (349,34)     | 122-125 °C ethanol        |
| <b>3g</b> | CO-2-thienyl      | OMe            | O  | C <sub>16</sub> H <sub>11</sub> N <sub>3</sub> O <sub>3</sub> S (325,34)   | 204-205 °C ethanol        |
| <b>3h</b> | CO-3-thienyl      | OMe            | O  | C <sub>16</sub> H <sub>11</sub> N <sub>3</sub> O <sub>3</sub> S (325,34)   | 207-208 °C ethanol        |
| <b>4a</b> | CO-(2-OMe)-Ph     | OMe            | Cl | C <sub>19</sub> H <sub>14</sub> N <sub>3</sub> O <sub>3</sub> Cl (367,79)  | 173-175 °C ethanol        |
| <b>4b</b> | CO-2-thienyl      | OMe            | Cl | C <sub>16</sub> H <sub>10</sub> N <sub>3</sub> O <sub>2</sub> SCl (343,79) | 169-170 °C ethanol        |
| <b>4c</b> | CO-3-thienyl      | OMe            | Cl | C <sub>16</sub> H <sub>10</sub> N <sub>3</sub> O <sub>2</sub> SCl (343,79) | 167-169 °C ethanol        |
| <b>5a</b> | phenyl            | H              | H  | C <sub>16</sub> H <sub>11</sub> N <sub>3</sub> (245,10)                    | 148-150 °C ethanol 80%    |
| <b>5b</b> | 2-thienyl         | H              | H  | C <sub>14</sub> H <sub>9</sub> N <sub>3</sub> S (251,31)                   | 248-250 °C ethanol 80%    |
| <b>5c</b> | 3-thienyl         | H              | H  | C <sub>14</sub> H <sub>9</sub> N <sub>3</sub> S (251,31)                   | 253-255 °C ethanol 80%    |
| <b>5d</b> | 2-thienyl         | OMe            | H  | C <sub>15</sub> H <sub>11</sub> N <sub>3</sub> OS (281,33)                 | 158-160 °C ethanol 80%    |
| <b>5e</b> | 3-thienyl         | OMe            | H  | C <sub>15</sub> H <sub>11</sub> N <sub>3</sub> OS (281,33)                 | 161-163 °C ethanol 80%    |
| <b>5f</b> | 2-MeO-phenyl      | OMe            | H  | C <sub>18</sub> H <sub>15</sub> N <sub>3</sub> O <sub>2</sub> (305,33)     | 166-168 °C ethanol        |
| <b>5g</b> | 3-furyl           | OMe            | H  | C <sub>15</sub> H <sub>11</sub> N <sub>3</sub> O <sub>2</sub> (265,27)     | 158-160 °C ethanol        |
| <b>5h</b> | 2-(1-Boc-pyrrole) | OMe            | H  | C <sub>20</sub> H <sub>20</sub> N <sub>4</sub> O <sub>3</sub> (364.40)     | oil                       |
| <b>5i</b> | 2-(1H)-pyrrole    | OMe            | H  | C <sub>15</sub> H <sub>12</sub> N <sub>4</sub> O (264.28)                  | 180-183 °C ethanol        |
| <b>6a</b> | CO-(2-OMe)-Ph     | OMe            | H  | C <sub>19</sub> H <sub>15</sub> N <sub>3</sub> O <sub>3</sub> (333,34)     | 242-244 °C ethanol        |
| <b>6b</b> | CO-2-thienyl      | OMe            | H  | C <sub>16</sub> H <sub>11</sub> N <sub>3</sub> O <sub>2</sub> S (309,34)   | 158-160 °C ethanol        |
| <b>6c</b> | CO-3-thienyl      | OMe            | H  | C <sub>16</sub> H <sub>11</sub> N <sub>3</sub> O <sub>2</sub> S (309,34)   | 155-157 °C ethanol        |

|            |                            |     |      |                                                                          |                           |
|------------|----------------------------|-----|------|--------------------------------------------------------------------------|---------------------------|
| <b>6d</b>  | CO-(4-OMe)-Ph              | OMe | H    | C <sub>19</sub> H <sub>15</sub> N <sub>3</sub> O <sub>3</sub> (333,34)   | 153-155 °C ethanol        |
| <b>6e</b>  | CO-2-furyl                 | OMe | H    | C <sub>16</sub> H <sub>11</sub> N <sub>3</sub> O <sub>3</sub> (293,28)   | 155-157 °C ethanol        |
| <b>6f</b>  | CO-2-(1H)-pyrrole          | OMe | H    | C <sub>16</sub> H <sub>12</sub> N <sub>4</sub> O <sub>2</sub> (292,29)   | 220-222 °C ethanol/water  |
| <b>6g</b>  | CO-2-(1-methyl-1H-pyrrole) | OMe | H    | C <sub>17</sub> H <sub>14</sub> N <sub>4</sub> O <sub>2</sub> (306,32)   | 178-180 °C ethanol/water  |
| <b>7</b>   | H                          | OMe | O    | C <sub>11</sub> H <sub>9</sub> N <sub>3</sub> O <sub>2</sub> (215,21)    | 279-280 °C methoxyethanol |
| <b>8</b>   | H                          | OMe | H    | C <sub>11</sub> H <sub>9</sub> N <sub>3</sub> O (199,21)                 | 139-141 °C ethanol        |
| <b>9a</b>  | Br                         | OMe | H    | C <sub>11</sub> H <sub>8</sub> N <sub>3</sub> OBr (278,10)               | 196-197 °C ethanol 80%    |
| <b>9b</b>  | I                          | OMe | H    | C <sub>11</sub> H <sub>8</sub> N <sub>3</sub> OI (325,11)                | 207-209 °C ethanol 80%    |
| <b>10</b>  | COOH                       | OMe | H    |                                                                          | [2]                       |
| <b>11a</b> | CO-(2-OMe)-Ph              | OMe | H, H | C <sub>19</sub> H <sub>17</sub> N <sub>3</sub> O <sub>3</sub> (335,36)   | 220-222 °C ethanol        |
| <b>11b</b> | CO-2-thienyl               | OMe | H, H | C <sub>16</sub> H <sub>13</sub> N <sub>3</sub> O <sub>2</sub> S (311,36) | 177-178 °C ethanol        |
| <b>11d</b> | CO-(4-OMe)-Ph              | OMe | H, H | C <sub>19</sub> H <sub>17</sub> N <sub>3</sub> O <sub>3</sub> (335,36)   | 141-143 °C ethanol        |
| <b>11e</b> | CO-2-furyl                 | OMe | H, H | C <sub>16</sub> H <sub>13</sub> N <sub>3</sub> O <sub>3</sub> (295,29)   | 148-151 °C ethanol        |
| <b>11f</b> | CO-2-(1H)-pyrrole          | OMe | H, H | C <sub>16</sub> H <sub>14</sub> N <sub>4</sub> O <sub>2</sub> (294,31)   | 230-233 °C ethanol        |
| <b>11g</b> | CO-2-(1-methyl-1H-pyrrole) | OMe | H, H | C <sub>17</sub> H <sub>16</sub> N <sub>4</sub> O <sub>2</sub> (308,33)   | 240-242 °C ethanol        |

- Penning**, T. D.; Thomas, S. A.; Hajduk, P. J.; Sauer, D. R.; Sarris, K.; Giranda, V. L. Potent PARP Inhibitors WO2007149907 A2
- Guerrini**, G.; Ciciani, G.; Crocetti, L.; Daniele, S.; Ghelardini, C.; Giovannoni, M. P.; Iacovone, A.; Di Cesare 43 Mannelli, L.; Martini, C.; Vergelli, C. Identification of a New Pyrazolo[1,5-a]quinazoline Ligand Highly 44 Affine to  $\gamma$ -Aminobutyric Type A (GABAA) Receptor Subtype with Anxiolytic-Like and Antihyperalgesic 45 Activity. *J. Med. Chem.* **2017**, *60*, 9691–9702, doi:10.1021/acs.jmedchem.7b01151.
